# Supplementary material
Source: PubMed Central journal article supplement (PMC4835343)
Supplement: NIHMS773018-supplement-Table_S1.pdf [file NIHMS773018-supplement-Table_S1.pdf]

Supplementary Table 1. Data per group for selected studies

|                       | Influenza positive               |     | Influenza negative |      |
|-----------------------|----------------------------------|-----|--------------------|------|
|                       | <i>Mycoplasma pneumoniae</i>     |     |                    |      |
| Study                 | +                                | -   | +                  | -    |
| <b>Reinton et al.</b> | 25                               | 249 | 873                | 2514 |
| Lieberman et al.      | 2                                | 13  | 36                 | 71   |
| Renner et al.         | 1                                | 127 | 90                 | 793  |
|                       | <i>Chlamydomphila pneumoniae</i> |     |                    |      |
|                       | +                                | -   | +                  | -    |
| <b>Reinton et al.</b> | 1                                | 33  | 897                | 2730 |
| Lieberman et al.      | 5                                | 17  | 33                 | 67   |
|                       | <i>Bordatella pertussis</i>      |     |                    |      |
|                       | +                                | -   | +                  | -    |
| <b>Reinton et al.</b> | 20                               | 78  | 878                | 2685 |
| Lieberman et al.      | 0                                | 9   | 38                 | 75   |
